# Supplementary material
Source: PubMed Central journal article supplement (PMC3126649)
Supplement: supp_111.180091_JPET180091_Supplemental_Data.pdf [file supp_111.180091_JPET180091_Supplemental_Data.pdf]

## SUPPLEMENTAL DATA

### **Naturally Occurring Variations in the Human *Cholinesterase* Genes: Heritability and Association with Cardiovascular and Metabolic Parameters**

Anne M. Valle<sup>1,5</sup>, Zoran Radić<sup>1,5</sup>, Brinda K. Rana<sup>3</sup>, Vafa Mahboubi<sup>5</sup>, Jennifer Wessel<sup>3</sup>, Pei-an Shih<sup>2</sup>, Fangwen Rao<sup>2</sup>, Daniel T. O'Connor<sup>1,2,4</sup>, and Palmer Taylor<sup>1,4,5</sup>.

Departments of Pharmacology<sup>1</sup>, Medicine<sup>2</sup>, Psychiatry<sup>3</sup>, Institute for Genomic Medicine<sup>4</sup>, and Skaggs School of Pharmacy and Pharmaceutical Sciences<sup>5</sup>, University of California at San Diego, 9500 Gilman Drive, La Jolla, CA 92093-0657

Running Title: Human *cholinesterase* variants and cardiovascular function

Corresponding author: Palmer Taylor, Ph.D  
Skaggs School of Pharmacy & Pharmaceutical Sciences  
University of California at San Diego  
9500 Gilman Drive  
La Jolla, CA 92093-0657  
E-mail: [pwtaylor@ucsd.edu](mailto:pwtaylor@ucsd.edu)  
Phone: 858-534-1366

FAX : 858-534-8248

**Table S1. *ACHE* SNP Results: Characteristics of single nucleotide polymorphisms discovered upon resequencing of human *ACHE* gene.**

**ACHe gene ID:43**

| <b>NT_007933.14, Reverse Complement</b> |            |                 |                              |                                 |                        |                        |                          |                            |          |
|-----------------------------------------|------------|-----------------|------------------------------|---------------------------------|------------------------|------------------------|--------------------------|----------------------------|----------|
| <b>SNP #</b>                            | <b>SNP</b> | <b>Location</b> | <b>AA# in mature protein</b> | <b>AA # with signal peptide</b> | <b>dbSNP rs number</b> | <b>Contig position</b> | <b>Euro MA frequency</b> | <b>Afr-Am MA frequency</b> | <b>N</b> |
| 1                                       | C/t        | Intron 1        | --                           | --                              | rs17880615             | 25727172               | 0.00                     | 0.04                       | 73       |
| 2                                       | G/c        | Intron 1        | --                           | --                              | rs17883799             | 25727109               | 0.03                     | 0.00                       | 75       |
| 3                                       | C/t        | Intron 1        | --                           | --                              | --                     | --                     | 0.00                     | 0.02                       | 69       |
| 4                                       | C/t        | Intron 1        | --                           | --                              | rs10953305             | 25726844               | 0.50                     | 0.21                       | 67       |
| 5*                                      | G/a        | Exon 2          | Arg3Gln                      | Arg34Gln                        | rs17881553             | 25726029               | 0.00                     | 0.09                       | 74       |
| 6                                       | G/c        | Exon 2          | Asp134His                    | Asp165His                       | --                     | --                     | 0.05                     | 0.02                       | 71       |
| 7                                       | G/a        | Exon 2          | Thr238Thr                    | Thr269Thr                       | rs17228581             | 25725323               | 0.00                     | 0.05                       | 79       |
| 8*                                      | G/a        | Exon 2          | Glu313Glu                    | Glu344Glu                       | rs17880119             | 25725098               | 0.00                     | 0.03                       | 77       |
| 9*                                      | C/a        | Exon 2          | His322Asn                    | His353Asn                       | rs1799805              | 25725073               | 0.03                     | 0.02                       | 76       |
| 10                                      | G/a        | Intron 2        | --                           | --                              | --                     | --                     | 0.00                     | 0.05                       | 76       |
| 11                                      | G/c        | Intron 2        | --                           | --                              | --                     | --                     | 0.00                     | 0.02                       | 78       |
| 12*                                     | C/t        | Exon 3          | Pro446Pro                    | Pro477Pro                       | rs7636                 | 25724353               | 0.03                     | 0.22                       | 76       |
| 13                                      | C/g        | Exon 5          | Pro561Arg                    | Pro592Arg                       | rs1799806              | 25723862               | 0.42                     | 0.12                       | 77       |
| 14                                      | C/a        | Intron 5        | --                           | --                              | --                     | --                     | 0.00                     | 0.02                       | 75       |
| 15                                      | G/a        | 3'-UTR          | --                           | --                              | rs17228609             | 25722024               | 0.00                     | 0.07                       | 75       |
| 16*                                     | C/a        | 3'-UTR          | --                           | --                              | rs17228616             | 25721997               | 0.06                     | 0.34                       | 75       |
| 17                                      | A/g        | 3'-UTR          | --                           | --                              | rs2396755              | 25721796               | 0.10                     | 0.28                       | 63       |
| 18                                      | C/a        | 3'-UTR          | --                           | --                              | rs17880700             | 25721593               | 0.00                     | 0.23                       | 66       |
| 19                                      | C/t        | 3'-UTR          | --                           | --                              | rs17885823             | 25721577               | 0.00                     | 0.13                       | 67       |

\*SNPs used to impute *ACHE* haplotypes in Table 2. N = number of individuals re-sequenced. AA#: amino acid number. Euro/Afr-Am MA Frequency = minor allele frequency in subjects of European versus African-American ancestry.

**Table S2. Kinetic Parameters for wtT547 and Mutant Enzymes.**

| Enzyme      | $K_m$ (mM)      | $K_{ss}$ (mM) | $b$              | $k_{cat}$ ( $10^5$ /min) |
|-------------|-----------------|---------------|------------------|--------------------------|
| wtT547      | $0.13 \pm 0.01$ | $11 \pm 2$    | $0.036 \pm 0.03$ | $1.9 \pm 0.2$            |
| R3Q         | $0.15 \pm 0.02$ | $8.6 \pm 1.6$ | $0.086 \pm 0.03$ | $1.8 \pm 0.1$            |
| D134H       | $0.17 \pm 0.02$ | $11 \pm 3$    | $0.11 \pm 0.04$  | $2.0 \pm 0.4$            |
| H322N       | $0.14 \pm 0.02$ | $8.4 \pm 2.4$ | $0.096 \pm 0.04$ | $1.9 \pm 0.2$            |
| D134H/R136Q | $0.14 \pm 0.02$ | $16 \pm 4$    | $0.062 \pm 0.05$ | $1.8 \pm 0.1$            |

Values for  $K_m$ ,  $K_{ss}$ , and  $b$  were calculated using nonlinear computer fitting according to eq I in figure 4 of the manuscript.  $k_{cat}$  was determined by stoichiometric titration of AChE activity with the covalent organophosphate inhibitor SpDMB.

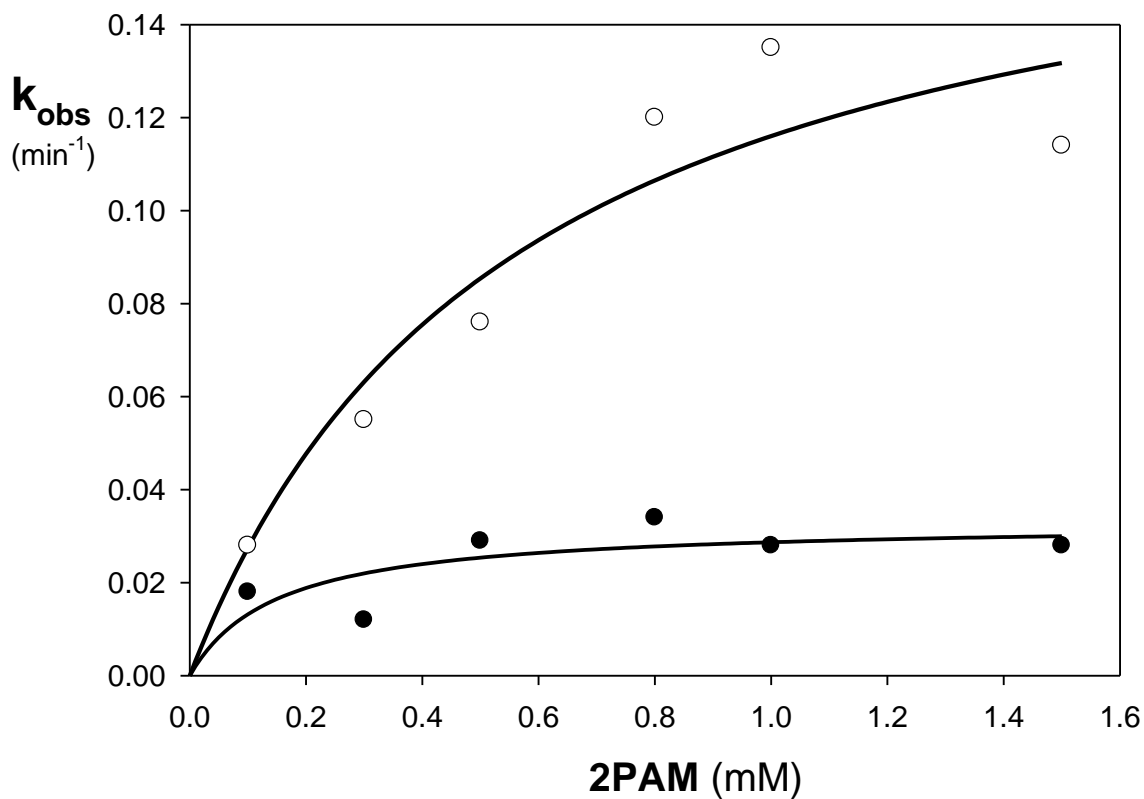

**Fig. S1. Reactivation of paraoxon-inhibited wild-type (●) and D134H (○) hAChE by different 2PAM concentrations.** Dependence of the first order reactivation rate constants ( $k_{\text{obs}}$ ) determined for individual 2PAM concentrations is given. Nonlinear regression analysis (Kovarik, 2004) yielded the following kinetic constants:  $k_{+2} = (0.033 \pm 0.007) \text{ min}^{-1}$ ,  $K_{\text{ox}} = (0.15 \pm 0.14) \text{ mM}$ ,  $k_{\text{r}} = 220 \text{ M}^{-1} \text{ min}^{-1}$  for wild type hAChE and  $k_{+2} = (0.18 \pm 0.04) \text{ min}^{-1}$ ,  $K_{\text{ox}} = (0.56 \pm 0.31) \text{ mM}$ ,  $k_{\text{r}} = 320 \text{ M}^{-1} \text{ min}^{-1}$  for D134H hAChE.
